# Supplementary material for: Idiotope-Driven T-Cell/B-Cell Collaboration-Based T-Cell Epitope Prediction Using B-Cell Receptor Repertoire Sequences in Infectious Diseases
Source: MDPI journal article supplement (doi:10.3390/v15051186), 2023-05-17
Supplement: s1 [file s1]

## Supplementary Materials

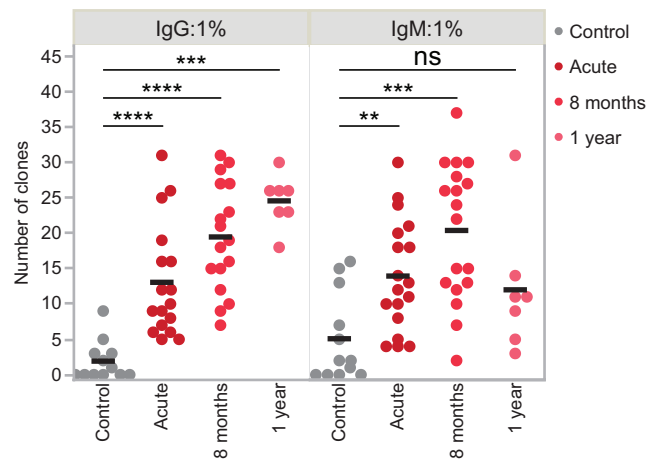

**Figure S1.** Expansion of IgG and IgM clones in response to DENV infection persists during the convalescent phases. The number of BCR clones (IgG and IgM) with a frequency of over 1% were compared between healthy donor controls and the different phases of DENV infection. Expanded BCR clones persist for 8 months (IgG and IgM) and even 1 year (IgG) after infection. Black bars indicate the mean number of clones. Statistical significance was analyzed using the Mann–Whitney U test. \*\* $p < 0.01$ , \*\*\* $p < 0.001$ , \*\*\*\* $p < 0.0001$ , ns: not significant.

**Table S1.** Distribution and conservation of IGHV TREMs with the human proteome.

| Region <sup>a</sup> | IGHV           |                |                |                  | Unique in IGHV |               |               |                 | Overlap with human proteome |                 |                 |                  |
|---------------------|----------------|----------------|----------------|------------------|----------------|---------------|---------------|-----------------|-----------------------------|-----------------|-----------------|------------------|
|                     | TREM I         | TREM IIa       | TREM IIb       | mean             | TREM I         | TREM IIa      | TREM IIb      | mean            | TREM I                      | TREM IIa        | TREM IIb        | mean             |
| Total               | 100%<br>(3272) | 100%<br>(3275) | 100%<br>(3314) | 100%<br>(3287)   | 10.8%<br>(354) | 9.4%<br>(309) | 9.7%<br>(323) | 10%<br>(328.7)  | 89.2%<br>(2918)             | 90.6%<br>(2966) | 90.3%<br>(2991) | 90%<br>(2958.3)  |
| L                   | 12.8%<br>(418) | 13.3%<br>(437) | 13.5%<br>(448) | 13.2%<br>(434.3) | 0.6%<br>(19)   | 0.3%<br>(9)   | 0.5%<br>(15)  | 0.4%<br>(14.3)  | 12.2%<br>(399)              | 13.1%<br>(428)  | 13.1%<br>(433)  | 12.8%<br>(420)   |
| FR1                 | 19.3%<br>(633) | 21.8%<br>(715) | 21.2%<br>(701) | 20.8%<br>(683)   | 0.3%<br>(9)    | 1.3%<br>(43)  | 1.4%<br>(46)  | 1%<br>(32.7)    | 19.1%<br>(624)              | 20.5%<br>(672)  | 19.8%<br>(655)  | 19.8%<br>(650.3) |
| CDR1                | 12.1%<br>(395) | 9.7%<br>(317)  | 10%<br>(331)   | 10.6%<br>(347.7) | 4.8%<br>(157)  | 3.1%<br>(100) | 2.4%<br>(80)  | 3.4%<br>(112.3) | 7.3%<br>(238)               | 6.6%<br>(217)   | 7.6%<br>(251)   | 7.2%<br>(235.3)  |
| FR2                 | 19.1%<br>(625) | 21.4%<br>(702) | 21.1%<br>(699) | 20.5%<br>(675.3) | 2.4%<br>(78)   | 2.8%<br>(92)  | 2.8%<br>(93)  | 2.7%<br>(87.7)  | 16.7%<br>(547)              | 18.6%<br>(610)  | 18.3%<br>(606)  | 17.9%<br>(587.7) |
| CDR2                | 10.8%<br>(353) | 9.5%<br>(310)  | 9.7%<br>(323)  | 10%<br>(328.7)   | 1.1%<br>(37)   | 0.5%<br>(17)  | 0.7%<br>(24)  | 0.8%<br>(26)    | 9.7%<br>(316)               | 8.9%<br>(293)   | 9%<br>(299)     | 9.2%<br>(302.7)  |
| FR3                 | 25.9%<br>(848) | 24.2%<br>(794) | 24.5%<br>(812) | 24.9%<br>(818)   | 1.7%<br>(54)   | 1.5%<br>(48)  | 2%<br>(65)    | 1.7%<br>(55.7)  | 24.3%<br>(794)              | 22.8%<br>(746)  | 22.5%<br>(747)  | 23.2%<br>(762.3) |

<sup>a</sup> TREMs that are located across two regions were counted twice.

**Table S2.** Conserved TREMs between germline Ig sequences and DENV-1.

|      | TREM I                 | TREM IIa                 | TREM IIb                  |
|------|------------------------|--------------------------|---------------------------|
| IGHV | __AISGD__              | __GV_Q_GR__ <sup>a</sup> | __E_T_G_TT__              |
|      | __GPSLR__              | __LL_L_TP__ <sup>a</sup> | __G_G_A_GS__              |
|      | __IFGTA__              | __RL_S_VR__              | __G_L_W_GL__ <sup>a</sup> |
|      | __KPGTS__              | __SR_T_SI__              | __L_A_A_GT__              |
|      | __LLLTI__              | __TG_Q_QV__ <sup>a</sup> | __L_S_A_VK__ <sup>a</sup> |
|      | __NSRNT__              | __TY_C_RI__ <sup>a</sup> | __L_S_V_VG__ <sup>a</sup> |
|      | __SGKGL__              | __VY_G_IS__              | __L_T_L_LT__ <sup>a</sup> |
|      | __SGRGL__              |                          | __T_Y_C_RI__ <sup>a</sup> |
|      | __SGVSW__              |                          |                           |
|      | __SWNSG__              |                          |                           |
|      | __VKPSG__              |                          |                           |
|      | __YVSAI__              |                          |                           |
|      |                        |                          |                           |
| IGHC | __KEKEE__              | __DI_V_LL__              | __I_S_A_IF__              |
|      | __SRSTS__ <sup>a</sup> | __LP_S_EE__              | __P_A_L_KS__              |
|      | __SWNSG__              | __NE_V_LT__              | __R_G_A_KT__              |
|      | __WNTGE__              | __RE_K_VG__              | __S_Q_G_IF__              |
|      |                        | __SG_Y_LS__              | __T_T_P_TT__              |
|      |                        | __TA_L_KS__              | __V_F_L_LL__              |
|      |                        | __TQ_E_TL__              |                           |

<sup>a</sup> TREMs found as DENV-1 T-cell epitopes in BCR clones.

**Table S3.** HLA binding affinity of PBMCs tested in cultured ELISPOT assays.

|        | No                    | 1        | 2        | 3        | 4        | 7        | 8        | 11       | 14       |
|--------|-----------------------|----------|----------|----------|----------|----------|----------|----------|----------|
|        | TREM                  | NSA      |
|        | Epilope               | sequence |
|        | Position              | Position | Position | Position | Position | Position | Position | Position | Position |
| Cell 1 | DPA1*01:03/DPB1*04:01 | 5346.66  | 56.26    | 5351.99  | 12281.74 | 14299.56 | 402.82   | 1178.63  | 160.24   |
|        | DPA1*01:03/DPB1*05:01 | 2773.03  | 317.85   | 4503.13  | 8850.55  | 9421.11  | 581.88   | 707.39   | 277.91   |
|        | DPA1*02:02/DPB1*04:01 | 2543.42  | 37.97    | 3817.02  | 6625.83  | 8947.99  | 258.08   | 686.41   | 92.23    |
|        | DPA1*02:02/DPB1*05:01 | 2578.31  | 151.87   | 5882.87  | 8511.89  | 8751.33  | 504.5    | 549.42   | 132.78   |
|        | DQA1*01:02/DOB1*03:03 | 3659.1   | 1679.17  | 2580.79  | 10093.66 | 5262.41  | 5165.72  | 2669.29  | 2032.27  |
|        | DQA1*01:02/DOB1*05:02 | 6242.49  | 1959.84  | 6065.85  | 11018.07 | 16466.35 | 1887.07  | 5809.18  | 2676.2   |
|        | DQA1*02:01/DOB1*03:03 | 1353.97  | 586.31   | 884.5    | 3993.48  | 2377.55  | 2047.16  | 714.55   | 898.78   |
|        | DQA1*02:01/DOB1*05:02 | 5450.46  | 2704.78  | 6757.96  | 7184.29  | 12293.57 | 1760.02  | 4252.35  | 4105.86  |
|        | DRB1*07:01            | 499.74   | 142.44   | 1523.57  | 3327.24  | 1829.46  | 69.15    | 408.25   | 192.84   |
|        | DRB1*15:02            | 1718.84  | 643.06   | 4598.16  | 7086.16  | 3534.89  | 729.9    | 657.3    | 408.08   |
|        | DRB4*01:03            | 1226.69  | 356.5    | 1547.14  | 2871.31  | 1571.02  | 571.5    | 341.75   | 150.45   |
|        | DRB5*01:01            | 266.82   | 181.7    | 4061.68  | 2496.2   | 2671.39  | 122.72   | 50.14    | 147.14   |
| Cell 2 | DPA1*01:03/DPB1*04:01 | 5346.66  | 56.26    | 5351.99  | 12281.74 | 14299.56 | 402.82   | 1178.63  | 160.24   |
|        | DPA1*01:03/DPB1*04:02 | 5570.17  | 134.89   | 6399.86  | 13802.48 | 13670.5  | 616.85   | 1306.3   | 301.41   |
|        | DQA1*01:03/DOB1*03:01 | 660.9    | 688.82   | 505.07   | 2748.21  | 941.66   | 1259.07  | 422.21   | 849.99   |
|        | DQA1*01:03/DOB1*06:03 | 6139.27  | 2786.59  | 5494.27  | 14359.56 | 9980.83  | 5386.45  | 2597.35  | 2597.35  |
|        | DQA1*05:05/DOB1*03:01 | 791.41   | 1556.78  | 390.99   | 3335.9   | 797.41   | 1492.36  | 2502.35  | 2714.43  |
|        | DQA1*05:05/DOB1*06:03 | 4066.54  | 2977.81  | 2609.04  | 8767.92  | 5526.59  | 3649.18  | 5620.93  | 3692.71  |
|        | DRB1*13:01            | 530.23   | 219.41   | 881.68   | 1098.35  | 376.13   | 290.34   | 80.6     | 80.6     |
|        | DRB1*14:06            | 916.37   | 449.54   | 1885.23  | 2547.11  | 759.16   | 673.89   | 261.91   | 170.57   |
|        | DRB3*01:01            | 2809.08  | 2342.87  | 9121.4   | 12353.04 | 6546.58  | 4996.51  | 2834.42  | 2978.81  |
